# Supplementary material for: A bioavailable strontium (87Sr/86Sr) isoscape for Aotearoa New Zealand: Implications for food forensics and biosecurity
Source: PLOS journal article supplement (doi:10.1371/journal.pone.0264458), 2022-03-16

#### 4. COW MILK MAPS – TOP 33% POSTERIOR PROBABILITIES

Regions highlighted in blue represent the top 33% of areas predicted as potential regions-of-origin using bioavailable  $^{87}\text{Sr}/^{86}\text{Sr}$  where values “1” = Likely Origin and “2” = Unlikely Origin. The box in top left shows the area surrounding the cow milk sample’s actual place-of-origin marked by yellow circle. The hillshade layer was created using a GNS DEM 8m shapefile.

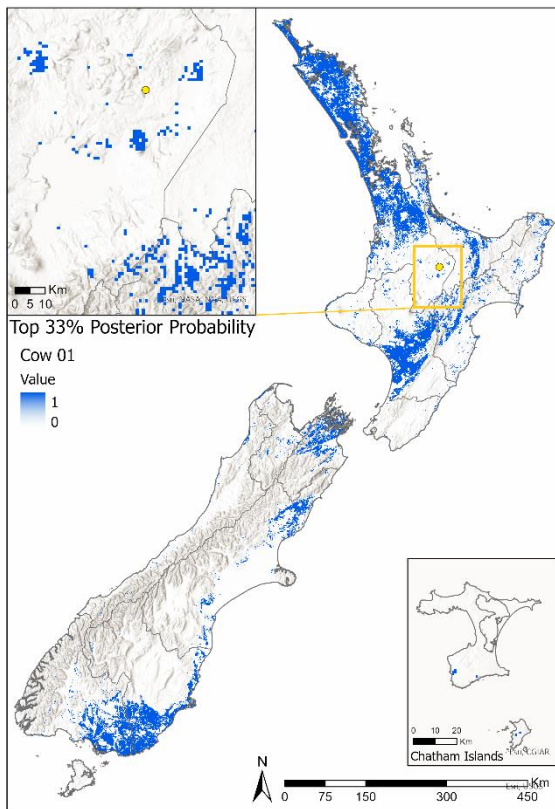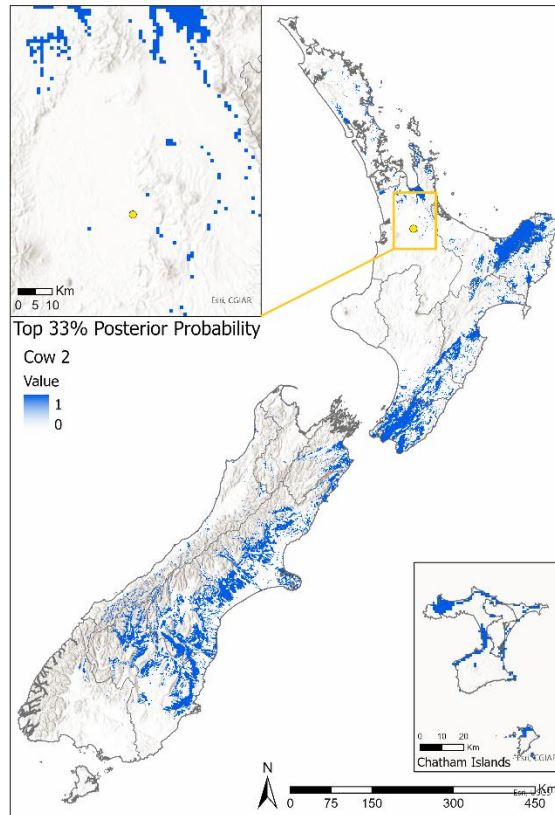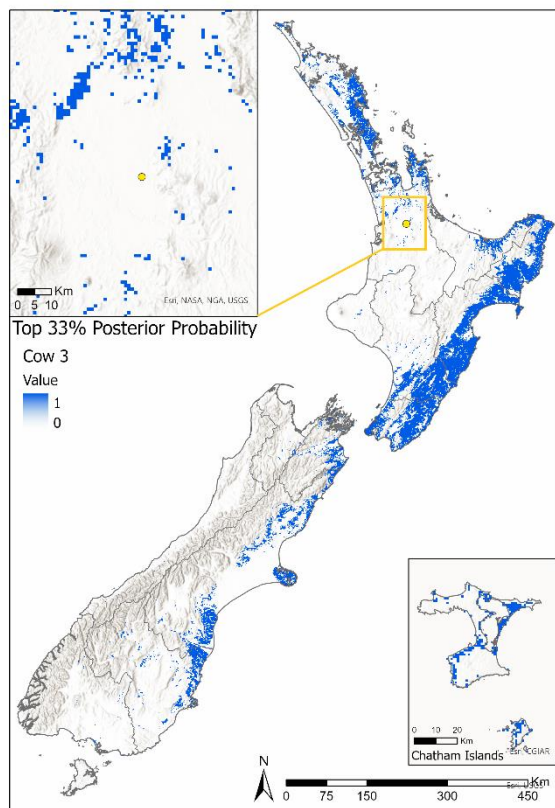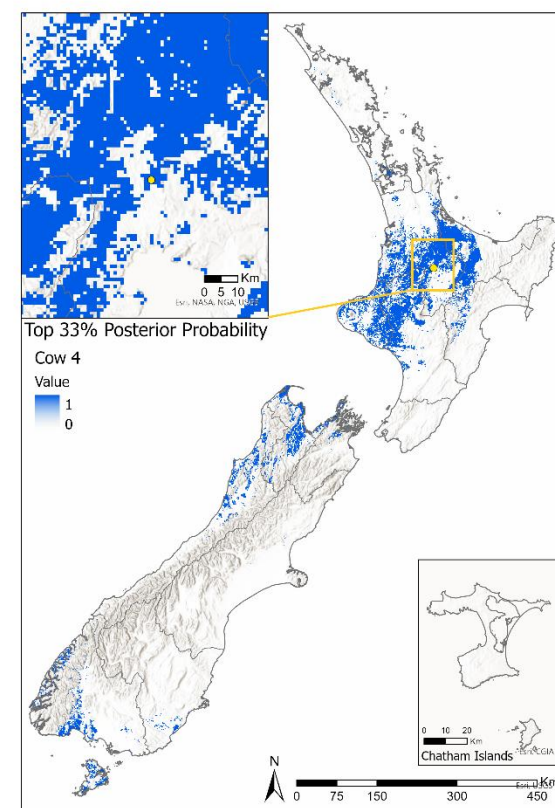

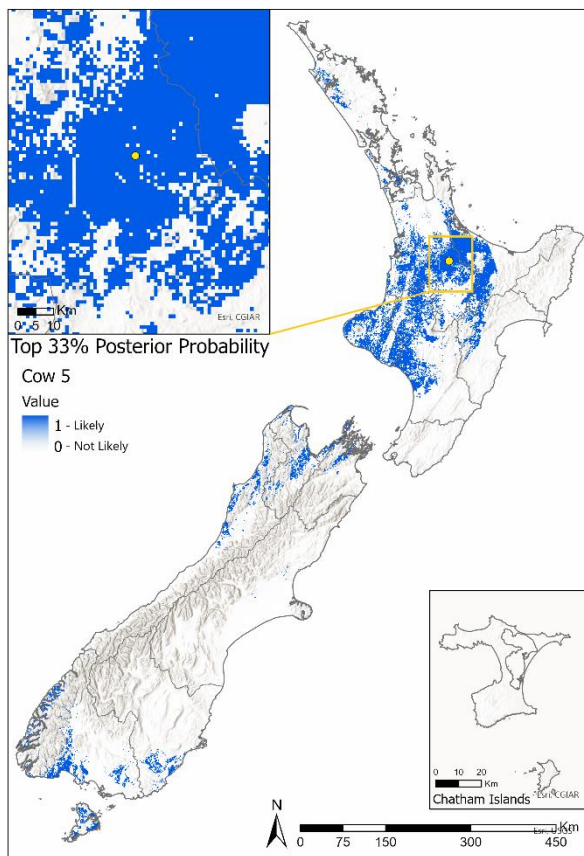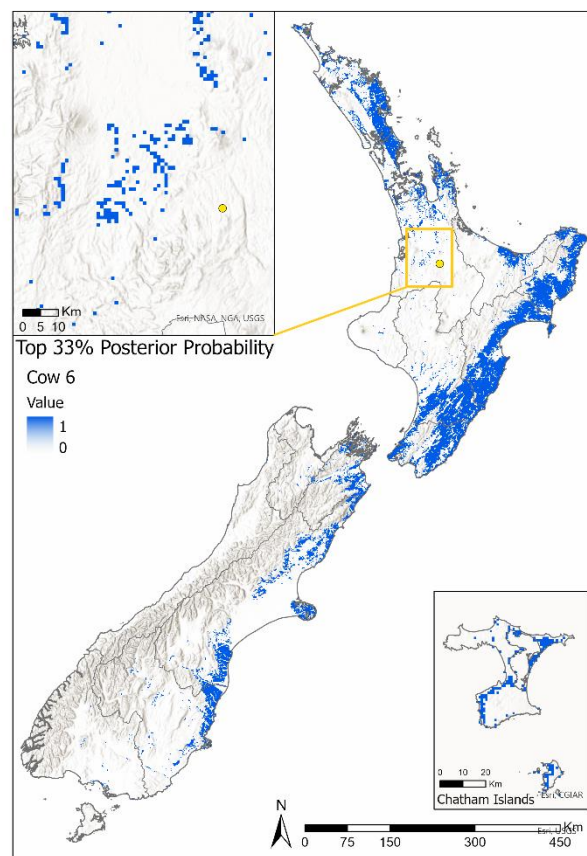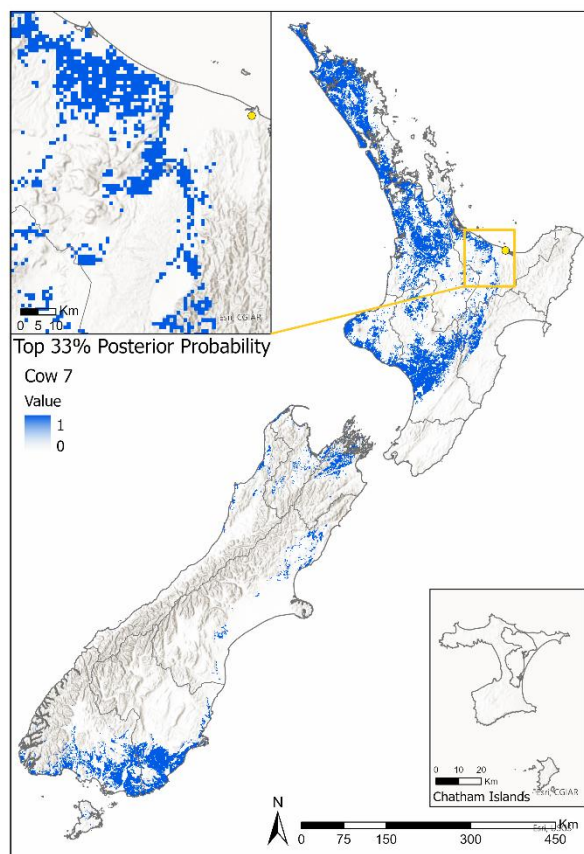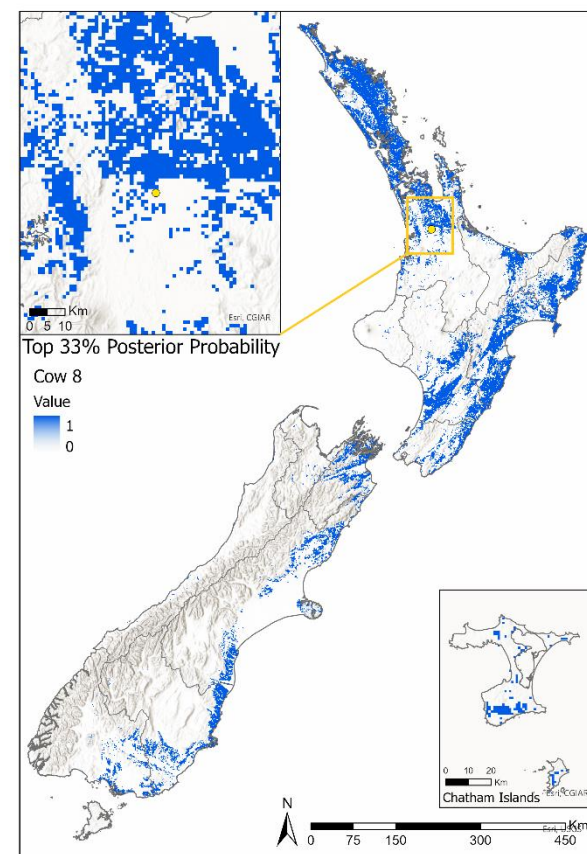



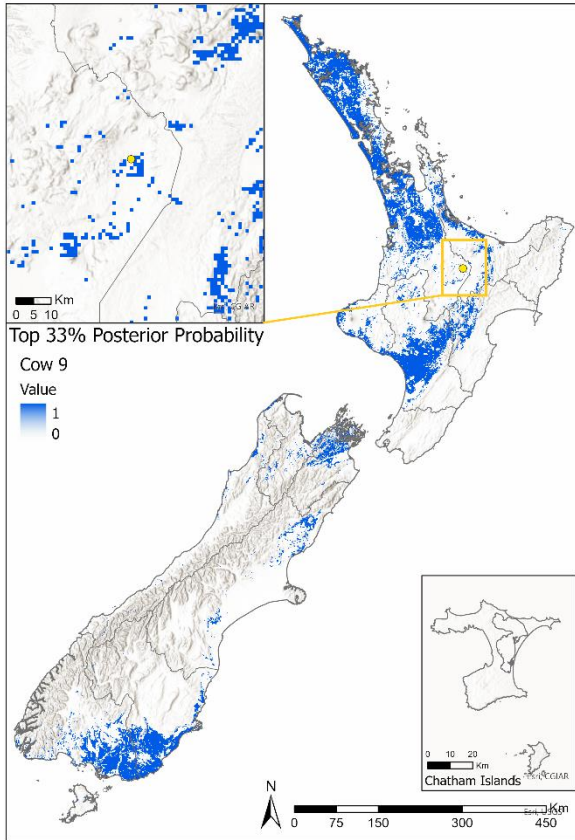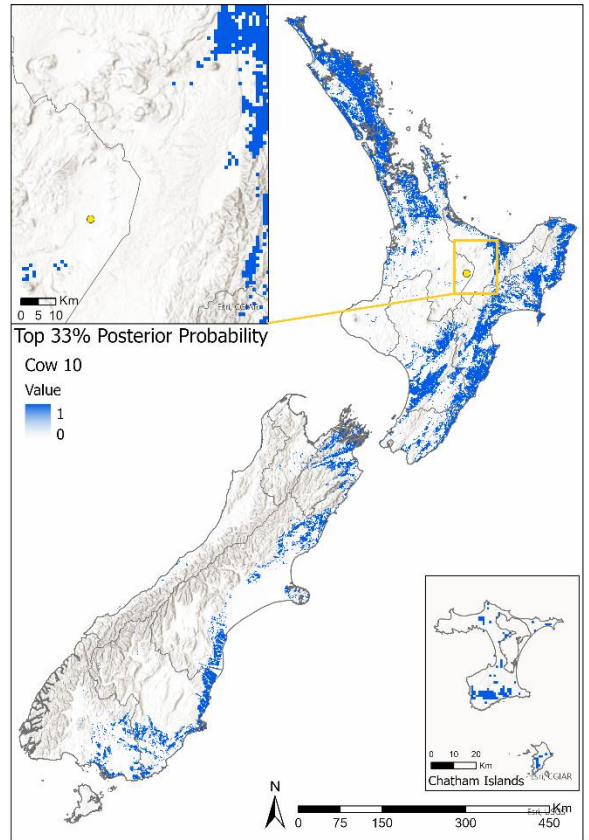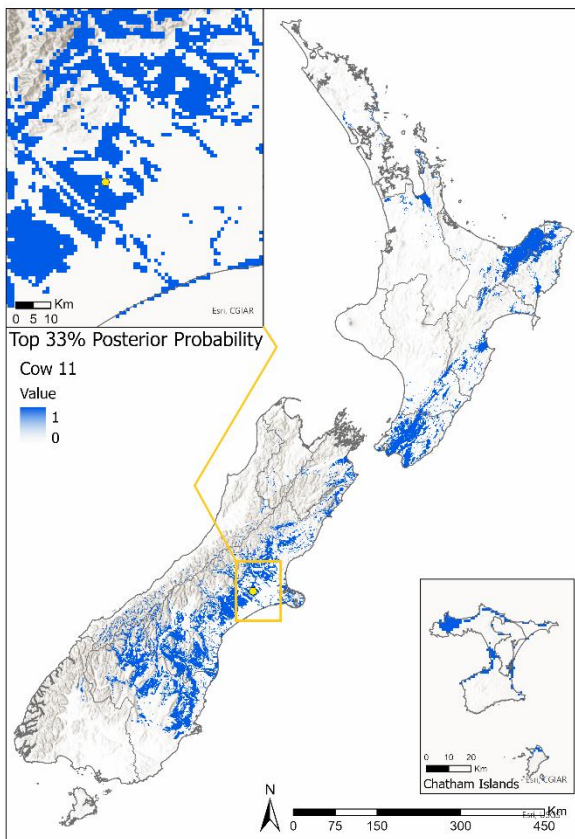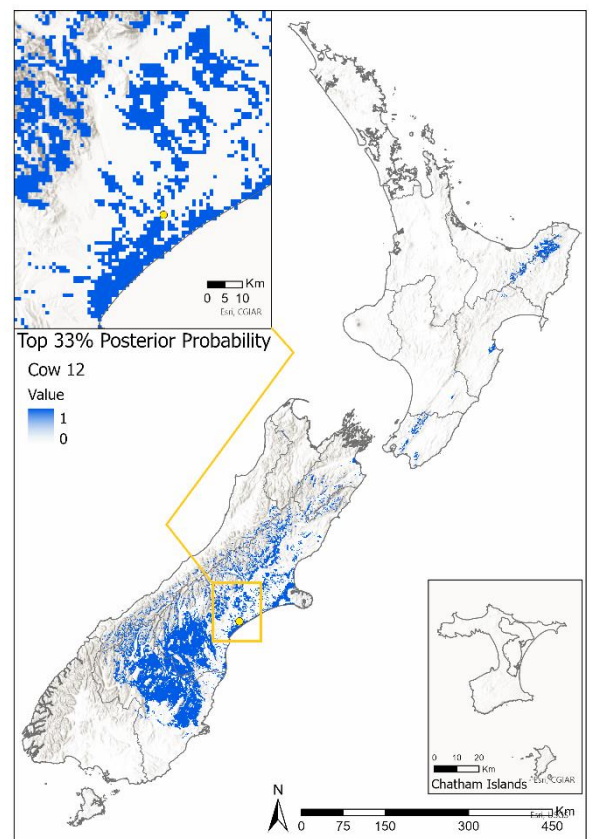

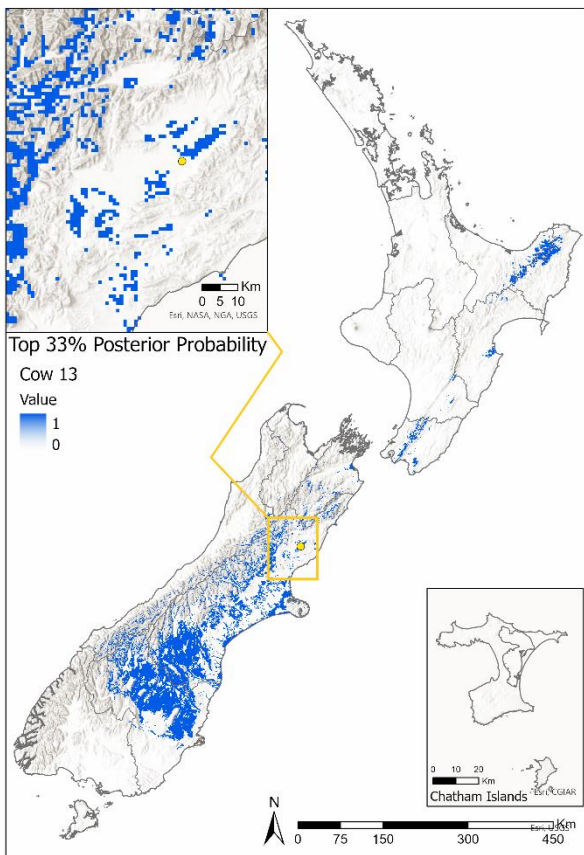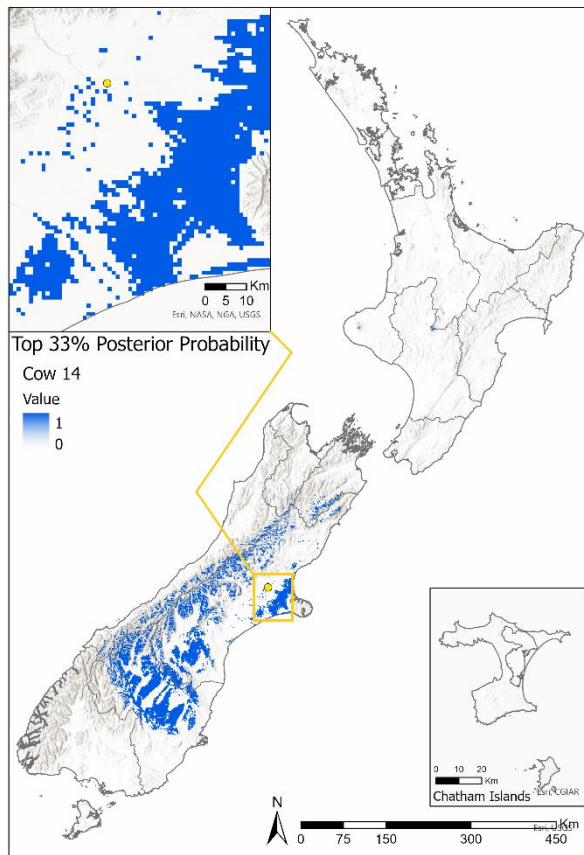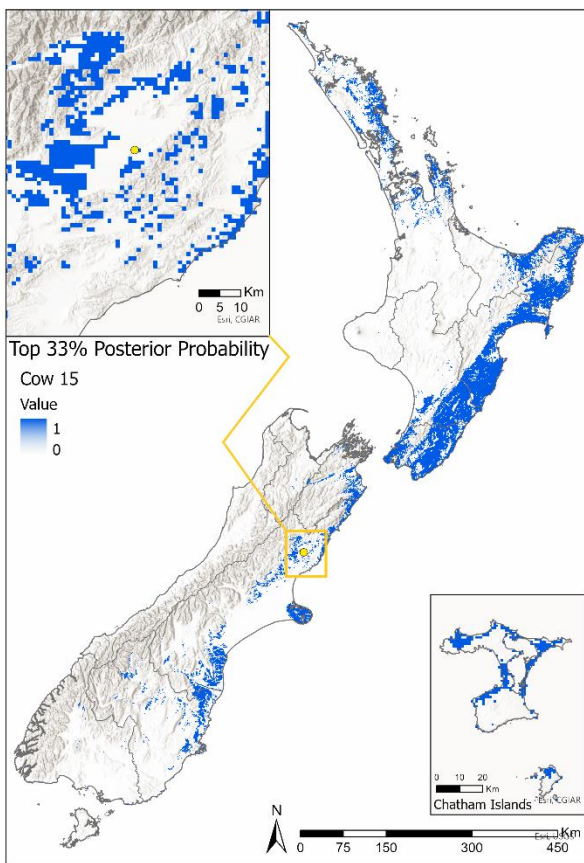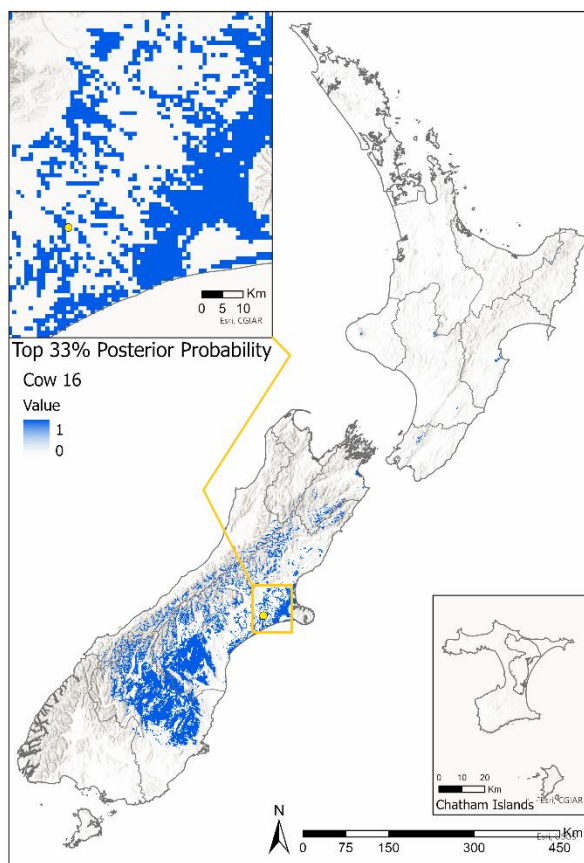



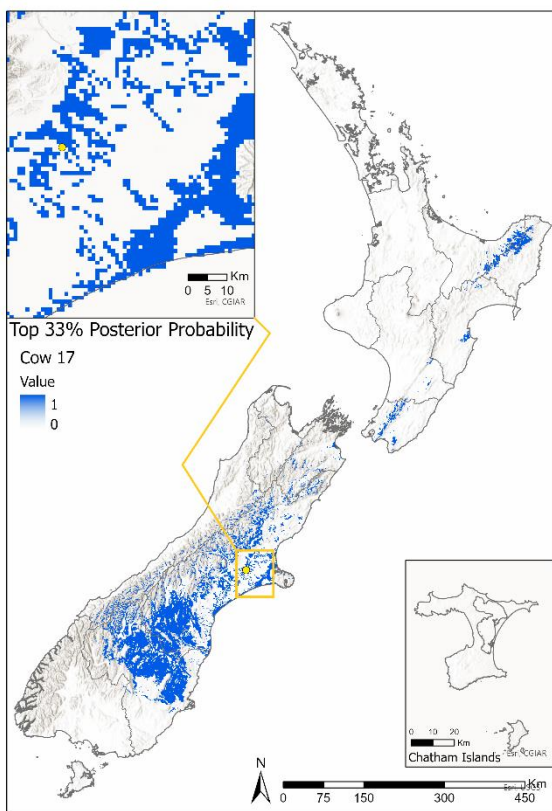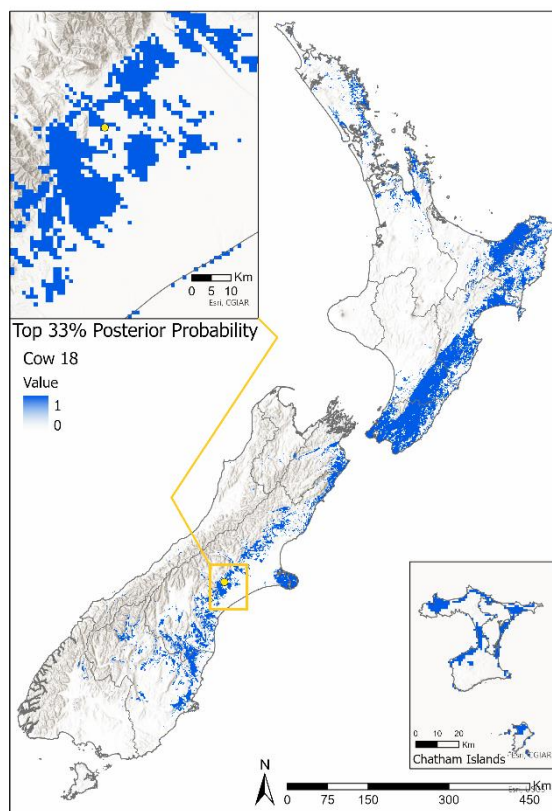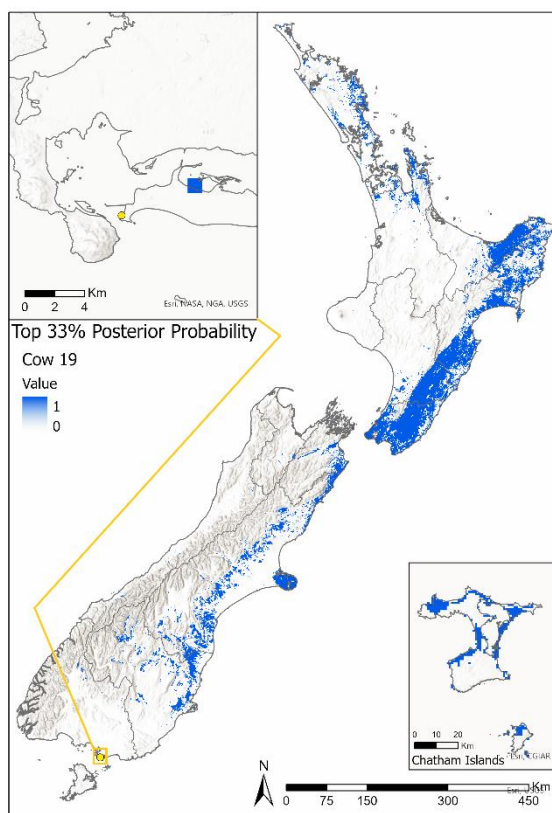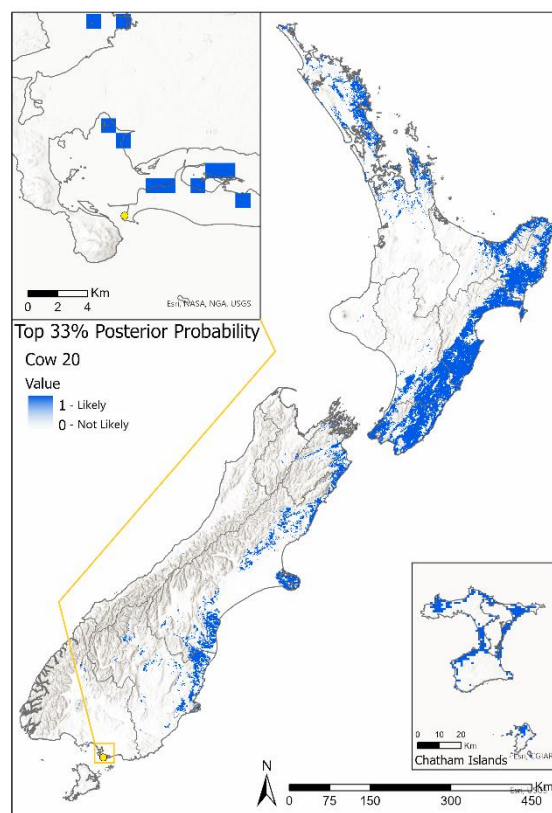

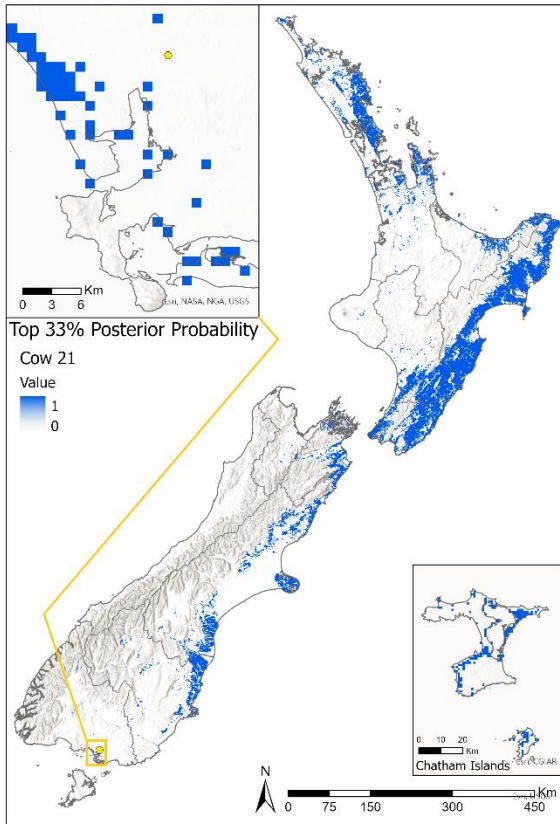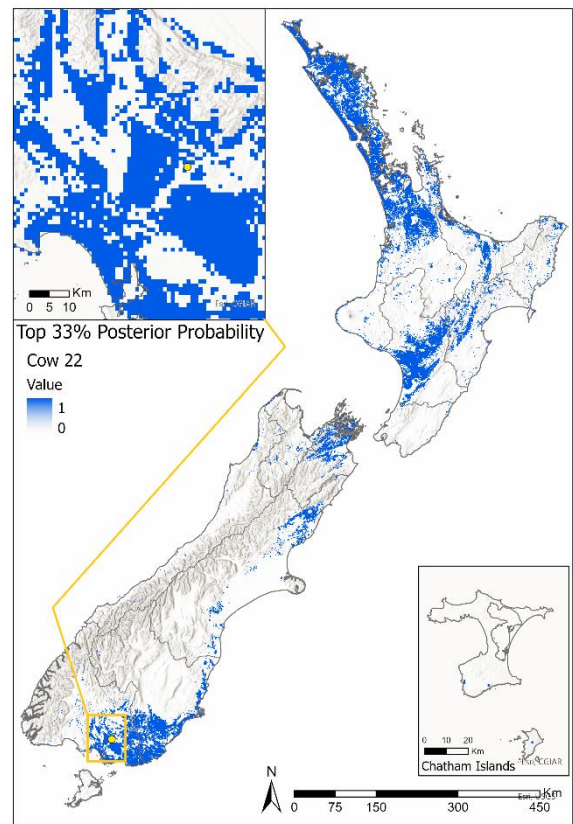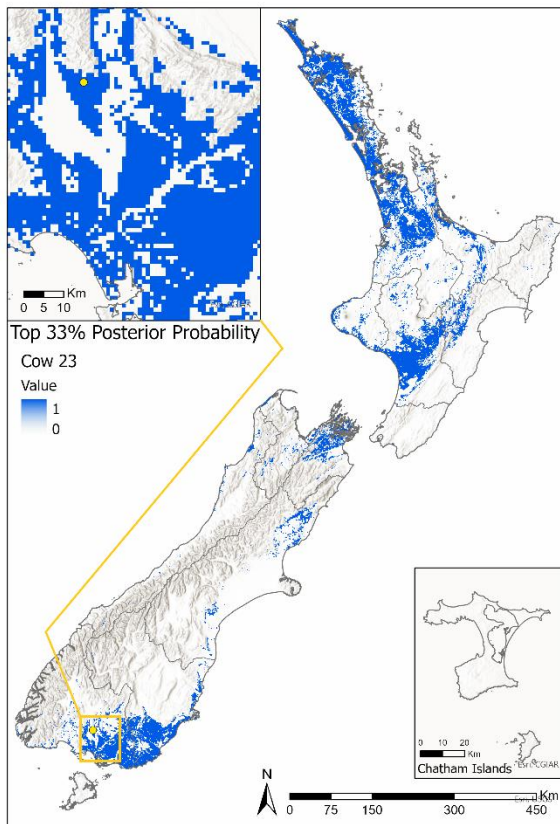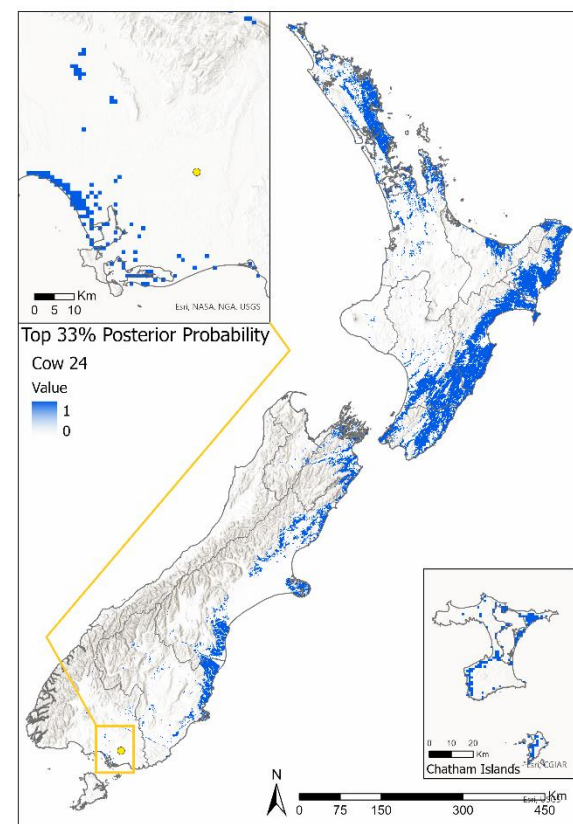



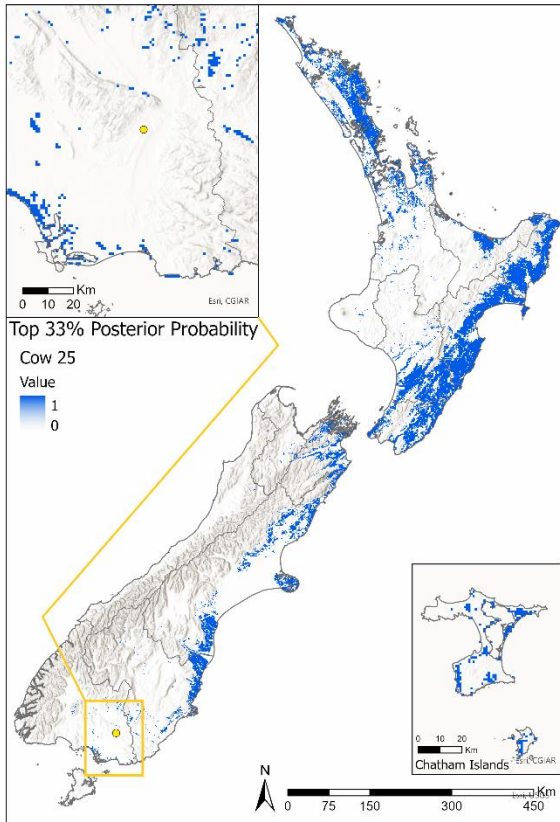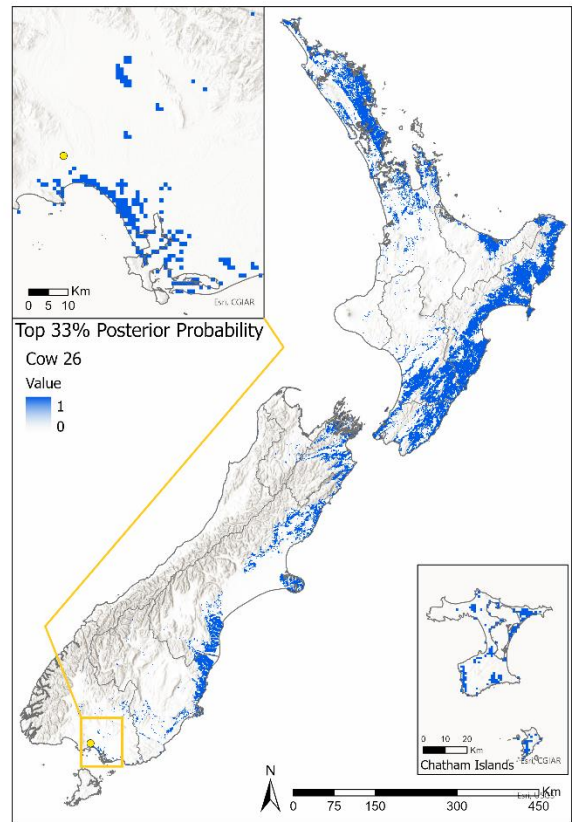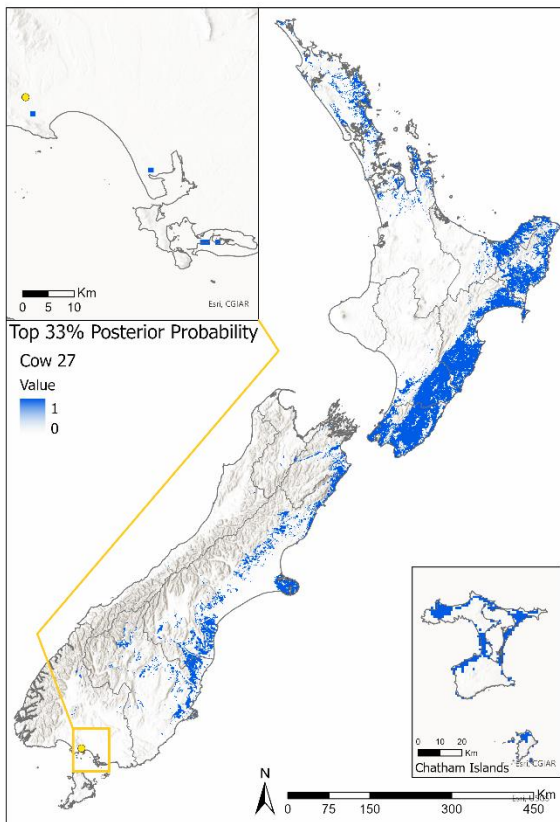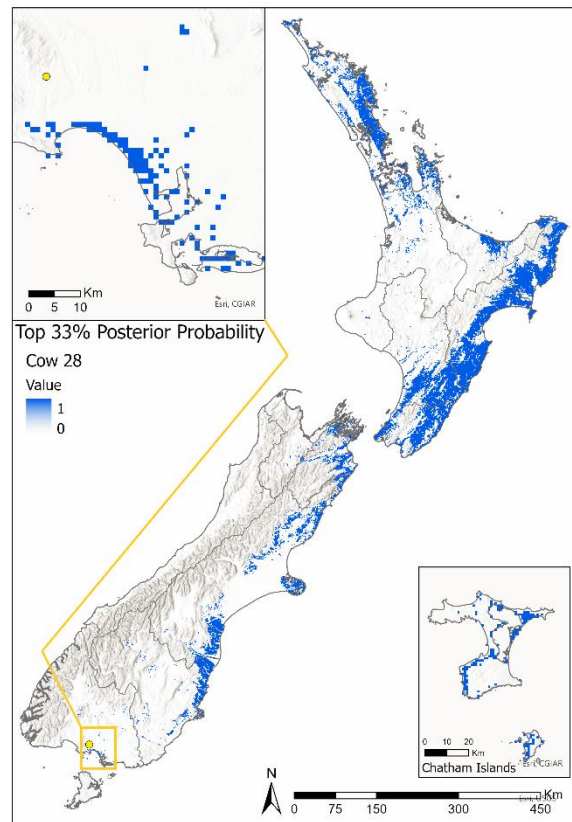

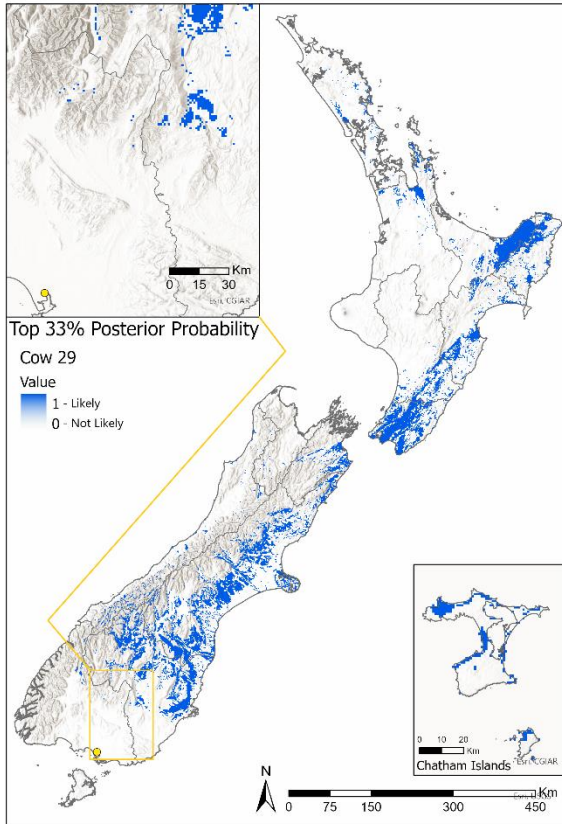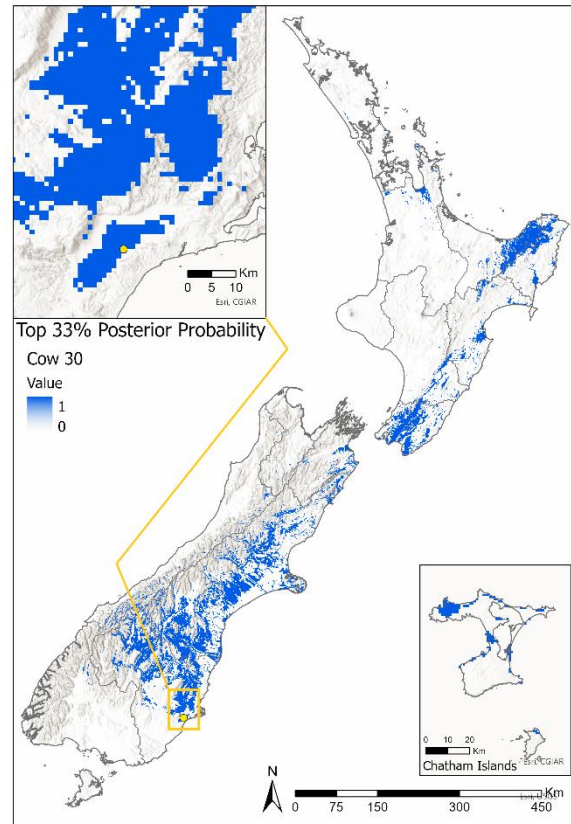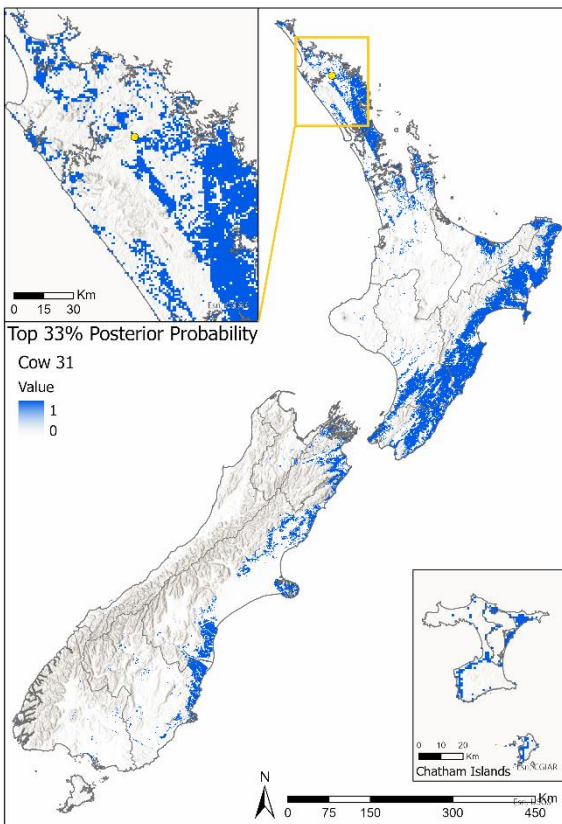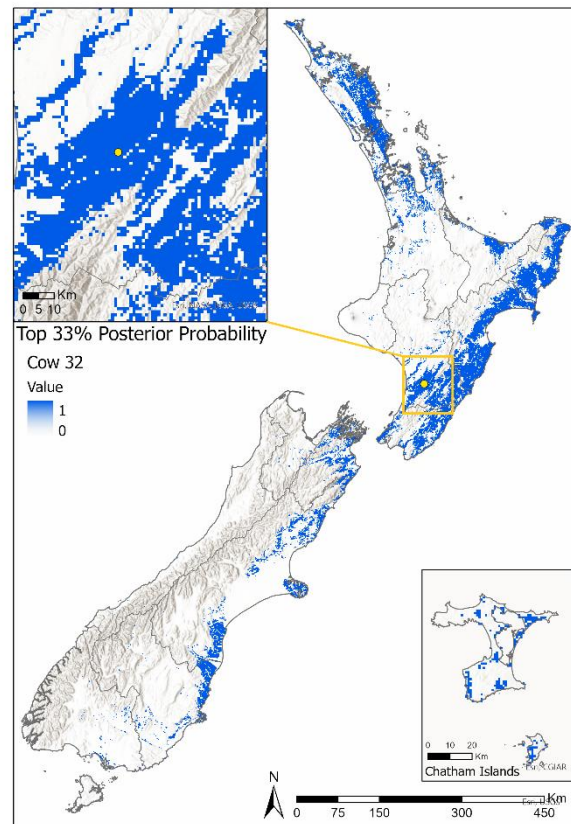



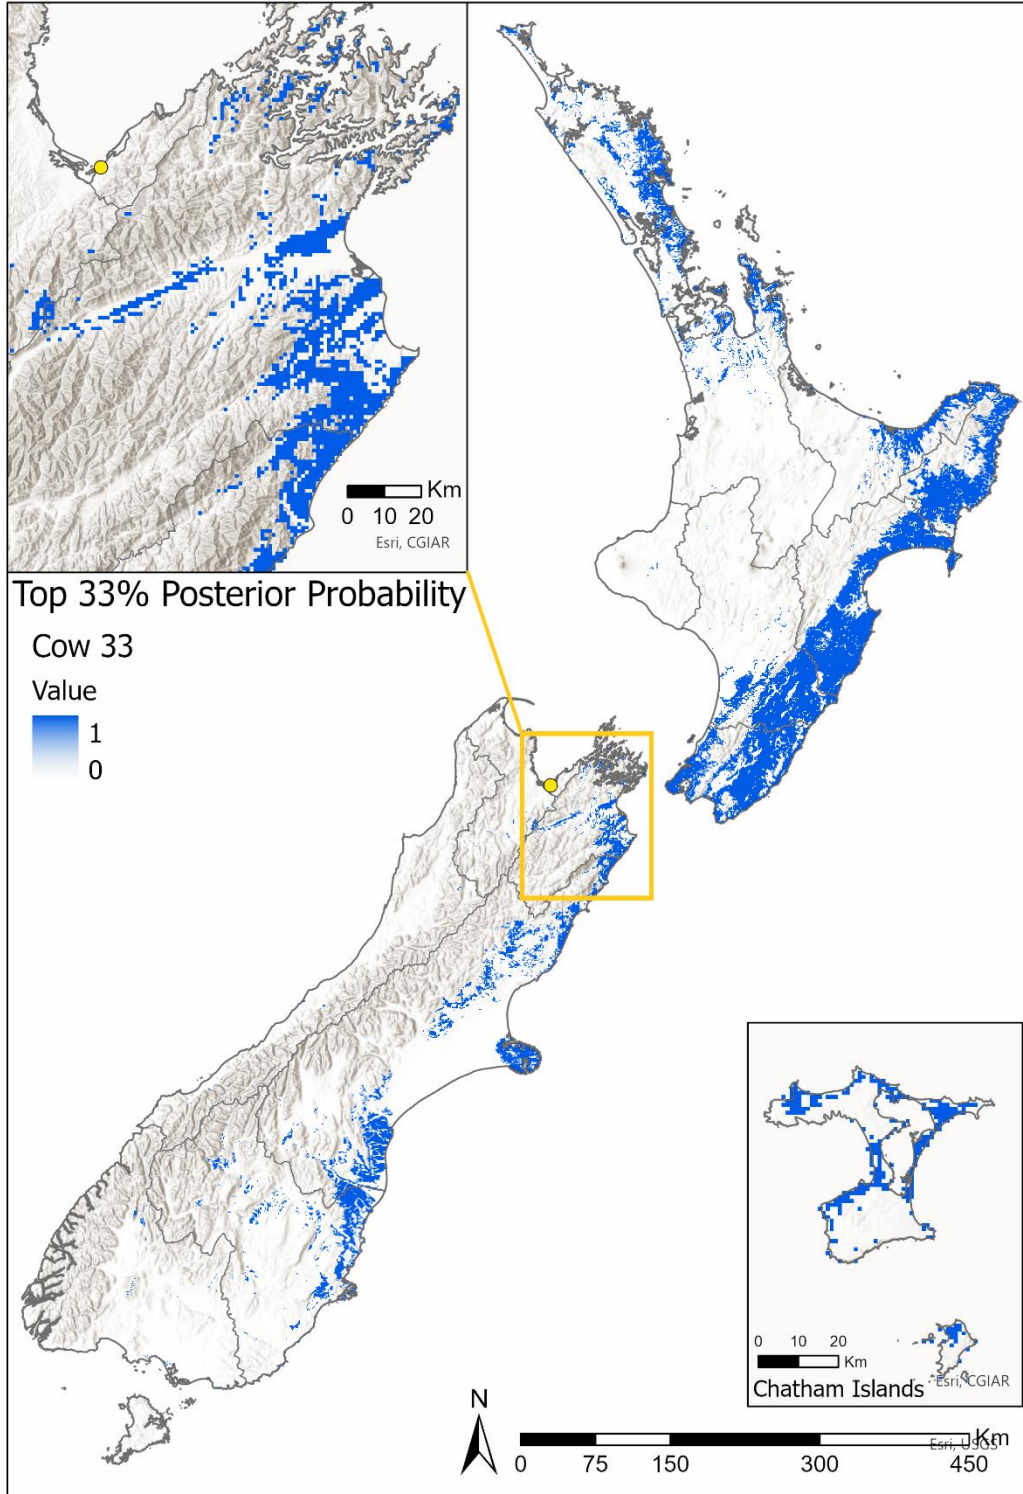

Supplement: S5 (10.1371/journal.pone.0264458.s005) [file journal.pone.0264458.s005]
